# Supplementary material for: Nanopore-Based Surveillance of Leishmania Parasites in Culicoides Latrielle (Diptera: Ceratopogonidae) Caught from the Affected Community and Tham Phra Cave in Chiang Rai Province, the Endemic Area of Leishmaniasis in Northern Thailand
Source: MDPI journal article supplement (doi:10.3390/insects15050327), 2024-05-02
Supplement: s1 [file s1]

**Table S1.** Statistics of nanopore sequenced reads and BLASTn identification.

| Species                      | Code | Consensus    | No. reads | Length (bp) | BLASTn Identification                      | % identity |
|------------------------------|------|--------------|-----------|-------------|--------------------------------------------|------------|
| <i>C. orientalis</i>         | PR2  | Consensus_01 | 14,131    | 281         | <i>L. martiniquensis</i> 770605 (KY982650) | 100        |
|                              |      | Consensus_02 | 2,558     | 272         | <i>L. orientalis</i> 378 (KY982674)        | 99.63      |
| <i>C. (Trithecoides) sp.</i> | PR3  | Consensus_01 | 14,037    | 281         | <i>L. martiniquensis</i> 770605 (KY982650) | 100        |
|                              |      | Consensus_02 | 4,662     | 270         | <i>L. orientalis</i> 378 (KY982674)        | 98.89      |
| <i>C. (Trithecoides) sp.</i> | PR5  | Consensus_01 | 2,239     | 273         | <i>L. orientalis</i> 340 (KY982673)        | 99.63      |
|                              |      | Consensus_02 | 479       | 320         | <i>L. martiniquensis</i> 770605 (KY982650) | 100        |
| <i>C. (Trithecoides) sp.</i> | PR6  | Consensus_01 | 15,242    | 281         | <i>L. martiniquensis</i> 770605 (KY982650) | 100        |
| <i>C. (Trithecoides) sp.</i> | PR8  | Consensus_01 | 17,204    | 281         | <i>L. martiniquensis</i> 770605 (KY982650) | 100        |
|                              |      | Consensus_02 | 3,561     | 306         | <i>L. martiniquensis</i> 770605 (KY982650) | 99.64      |
| <i>C. (Trithecoides) sp.</i> | PR10 | Consensus_01 | 23,000    | 279         | <i>L. martiniquensis</i> SK4-1 (MK603826)  | 99.64      |
| <i>C. (Trithecoides) sp.</i> | PR11 | Consensus_01 | 13,364    | 281         | <i>L. martiniquensis</i> 770605 (KY982650) | 100        |
|                              |      | Consensus_02 | 3,747     | 273         | <i>L. orientalis</i> PCM2 (JX195640)       | 99.26      |
|                              |      | Consensus_03 | 1,836     | 313         | <i>L. martiniquensis</i> 770605 (KY982650) | 99.64      |
| <i>C. (Trithecoides) sp.</i> | PR15 | Consensus_01 | 17,343    | 279         | <i>L. martiniquensis</i> SK4-1 (MK603826)  | 98.92      |
| <i>C. jacobsoni</i>          | PR21 | Consensus_01 | 15,408    | 281         | <i>L. martiniquensis</i> 770605 (KY982650) | 100        |
| <i>C. maharakhamense</i>     | PR22 | Consensus_01 | 15,462    | 281         | <i>L. martiniquensis</i> 770605 (KY982650) | 100        |
|                              |      | Consensus_02 | 5,228     | 273         | <i>L. orientalis</i> 340 (KY982673)        | 100        |
| <i>C. jacobsoni</i>          | PR23 | Consensus_01 | 14,569    | 280         | <i>L. martiniquensis</i> 770605 (KY982650) | 99.64      |
|                              |      | Consensus_02 | 2,235     | 273         | <i>L. orientalis</i> 340 (KY982673)        | 99.63      |
|                              |      | Consensus_03 | 1,645     | 313         | <i>L. martiniquensis</i> 770605 (KY982650) | 100        |
| <i>C. (Trithecoides) sp.</i> | PR24 | Consensus_01 | 14,232    | 282         | <i>L. martiniquensis</i> 770605 (KY982650) | 99.29      |
|                              |      | Consensus_02 | 2,428     | 275         | <i>L. orientalis</i> 609106 (KY982677)     | 99.27      |
| <i>C. maharakhamense</i>     | GS1  | Consensus_01 | 18,970    | 280         | <i>L. martiniquensis</i> 770605 (KY982650) | 97.15      |
| <i>C. oxystoma</i>           | GS10 | Consensus_01 | 8,516     | 281         | <i>L. martiniquensis</i> 770605 (KY982650) | 99.64      |
|                              |      | Consensus_02 | 6,043     | 273         | <i>L. orientalis</i> 609106 (KY982677)     | 98.54      |
|                              |      | Consensus_03 | 1,512     | 312         | <i>L. martiniquensis</i> 770605 (KY982650) | 100        |
| <i>C. oxystoma</i>           | GS12 | Consensus_01 | 13,130    | 281         | <i>L. martiniquensis</i> 770605 (KY982650) | 100        |
|                              |      | Consensus_02 | 1,484     | 273         | <i>L. orientalis</i> 409537 (KY982675)     | 100        |
| <i>C. maharakhamense</i>     | TP33 | Consensus_01 | 12,061    | 281         | <i>L. martiniquensis</i> 770605 (KY982650) | 100        |
|                              |      | Consensus_02 | 3,734     | 271         | <i>L. orientalis</i> 409537 (KY982675)     | 99.26      |
| <i>C. guttifer</i>           | TP34 | Consensus_01 | 14,131    | 281         | <i>L. martiniquensis</i> 770605 (KY982650) | 100        |
|                              |      | Consensus_02 | 862       | 273         | <i>L. orientalis</i> 409537 (KY982675)     | 100        |
| <i>C. guttifer</i>           | TP38 | Consensus_01 | 13,894    | 281         | <i>L. martiniquensis</i> 770605 (KY982650) | 100        |
|                              |      | Consensus_02 | 790       | 272         | <i>L. orientalis</i> 378 (KY982674)        | 100        |

**Table S1.** Statistics of nanopore sequenced reads and BLASTn identification. (Continued)

| Species                    | Code | Consensus    | No. reads | Length (bp) | BLASTn Identification                      | % identity |
|----------------------------|------|--------------|-----------|-------------|--------------------------------------------|------------|
| <i>C. guttifer</i>         | TP39 | Consensus_01 | 14,850    | 281         | <i>L. martiniquensis</i> 770605 (KY982650) | 100        |
| <i>C. mahasarakhamense</i> | TP43 | Consensus_01 | 13,242    | 281         | <i>L. martiniquensis</i> 770605 (KY982650) | 100        |
| <i>C. mahasarakhamense</i> | TP45 | Consensus_01 | 16,963    | 281         | <i>L. martiniquensis</i> 770605 (KY982650) | 100        |
|                            |      | Consensus_02 | 2,381     | 273         | <i>L. orientalis</i> 409537 (KY982675)     | 100        |
| <i>C. mahasarakhamense</i> | TP47 | Consensus_01 | 10,410    | 281         | <i>L. martiniquensis</i> 770605 (KY982650) | 100        |
| <i>C. guttifer</i>         | TP48 | Consensus_01 | 1,298     | 272         | <i>L. orientalis</i> 378 (KY982674)        | 100        |
|                            |      | Consensus_02 | 12,317    | 279         | <i>L. martiniquensis</i> SK4-1 (MK603826)  | 98.56      |
|                            |      | Consensus_03 | 3,673     | 309         | <i>L. martiniquensis</i> SK4-1 (MK603826)  | 98.92      |
|                            |      | Consensus_04 | 2,575     | 309         | <i>L. martiniquensis</i> SK4-1 (MK603826)  | 99.28      |
| <i>C. mahasarakhamense</i> | TP49 | Consensus_01 | 16,714    | 281         | <i>L. martiniquensis</i> 770605 (KY982650) | 100        |
| <i>C. mahasarakhamense</i> | TP50 | Consensus_01 | 17,396    | 281         | <i>L. martiniquensis</i> 770605 (KY982650) | 100        |
| <i>C. mahasarakhamense</i> | TP51 | Consensus_01 | 13,551    | 281         | <i>L. martiniquensis</i> 770605 (KY982650) | 100        |
|                            |      | Consensus_02 | 3,257     | 275         | <i>L. orientalis</i> 272078 (KY982669)     | 99.64      |
| <i>C. guttifer</i>         | TP53 | Consensus_01 | 13,509    | 281         | <i>L. martiniquensis</i> 770605 (KY982650) | 100        |
|                            |      | Consensus_02 | 3,265     | 273         | <i>L. orientalis</i> 409537 (KY982675)     | 100        |
| <i>C. mahasarakhamense</i> | TP54 | Consensus_01 | 1,319     | 273         | <i>L. orientalis</i> 378 (KY982674)        | 100        |
|                            |      | Consensus_02 | 16,190    | 281         | <i>L. martiniquensis</i> 770605 (KY982650) | 100        |
| <i>C. mahasarakhamense</i> | TP55 | Consensus_01 | 14,892    | 281         | <i>L. martiniquensis</i> 770605 (KY982650) | 100        |
| <i>C. guttifer</i>         | TP56 | Consensus_01 | 16,861    | 281         | <i>L. martiniquensis</i> 770605 (KY982650) | 100        |
| <i>C. mahasarakhamense</i> | TP57 | Consensus_01 | 14,464    | 281         | <i>L. martiniquensis</i> 770605 (KY982650) | 100        |
|                            |      | Consensus_02 | 1,189     | 272         | <i>L. orientalis</i> 378 (KY982674)        | 99         |
| <i>C. guttifer</i>         | TP58 | Consensus_01 | 13,718    | 281         | <i>L. martiniquensis</i> 770605 (KY982650) | 100        |
| <i>C. mahasarakhamense</i> | TP59 | Consensus_01 | 12,848    | 281         | <i>L. martiniquensis</i> 770605 (KY982650) | 100        |
|                            |      | Consensus_02 | 1,802     | 273         | <i>L. orientalis</i> 409537 (KY982675)     | 100        |
| <i>C. mahasarakhamense</i> | TP60 | Consensus_01 | 11,610    | 281         | <i>L. martiniquensis</i> 770605 (KY982650) | 100        |
| <i>C. guttifer</i>         | TP61 | Consensus_01 | 14,104    | 281         | <i>L. martiniquensis</i> 770605 (KY982650) | 100        |
| <i>C. guttifer</i>         | TP62 | Consensus_01 | 15,557    | 281         | <i>L. martiniquensis</i> 770605 (KY982650) | 100        |
| <i>C. guttifer</i>         | TP63 | Consensus_01 | 20,660    | 281         | <i>L. martiniquensis</i> 770605 (KY982650) | 100        |
|                            |      | Consensus_02 | 3,804     | 272         | <i>L. orientalis</i> 378 (KY982674)        | 100        |
| <i>C. mahasarakhamense</i> | TP64 | Consensus_01 | 19,052    | 279         | <i>L. martiniquensis</i> SK4-1 (MK603826)  | 98.56      |
|                            |      | Consensus_02 | 1,197     | 273         | <i>L. orientalis</i> 409537 (KY982675)     | 99.26      |
| <i>C. guttifer</i>         | TP65 | Consensus_01 | 12,702    | 281         | <i>L. martiniquensis</i> 770605 (KY982650) | 100        |
|                            |      | Consensus_02 | 2,541     | 272         | <i>L. orientalis</i> 409537 (KY982675)     | 99.63      |

**Table S2.** Haplotypes of 49 *L. martiniquensis* and 23 *L. orientalis* ITS1 sequences amplified from *Culicoides* biting midges collected in this study and patients previously reported from Northern Thailand.

| Species                  | Haplotypes (frequency) | Length (bp) | Accession numbers of associated <i>Leishmania</i> ITS1 sequences and hosts                                                                                                                                                                                                                                                                                                                                                                                                      |
|--------------------------|------------------------|-------------|---------------------------------------------------------------------------------------------------------------------------------------------------------------------------------------------------------------------------------------------------------------------------------------------------------------------------------------------------------------------------------------------------------------------------------------------------------------------------------|
| <i>L. martiniquensis</i> | Hap_1 (36)             | 259         | PP586221 ( <i>C. orientalis</i> _PR2; <i>C. (Trithecoides)</i> sp._PR3, PR5, PR6, PR8, PR11; <i>C. jacobsoni</i> _PR21, PR23; <i>C. oxystoma</i> _GS10, GS12; <i>C. mahasarakhamense</i> _PR22, TP33, TP43, TP45, TP47, TP49, TP50, TP54, TP55, TP57, TP59, TP60; <i>C. guttifer</i> _TP34, TP38, TP39, TP53, TP56, TP58, TP61, TP62, TP63, TP65), OM688240 (patient from Chiang Rai), JX898938 (a patient from Lamphun), KJ210834, and KJ210836 (two patients from Chiang Mai) |
|                          | Hap_2 (1)              | 259         | PP586222 ( <i>C. oxystoma</i> _GS10)                                                                                                                                                                                                                                                                                                                                                                                                                                            |
|                          | Hap_3 (1)              | 259         | PP586223 ( <i>C. (Trithecoides)</i> sp._PR08)                                                                                                                                                                                                                                                                                                                                                                                                                                   |
|                          | Hap_4 (1)              | 257         | PP586224 ( <i>C. (Trithecoides)</i> sp._PR10)                                                                                                                                                                                                                                                                                                                                                                                                                                   |
|                          | Hap_5 (1)              | 258         | PP586225 ( <i>C. jacobsoni</i> _PR23)                                                                                                                                                                                                                                                                                                                                                                                                                                           |
|                          | Hap_6 (1)              | 259         | PP586226 ( <i>C. (Trithecoides)</i> sp._PR11)                                                                                                                                                                                                                                                                                                                                                                                                                                   |
|                          | Hap_7 (1)              | 259         | PP586227 ( <i>C. mahasarakhamense</i> _TP51)                                                                                                                                                                                                                                                                                                                                                                                                                                    |
|                          | Hap_8 (1)              | 257         | PP586228 ( <i>C. mahasarakhamense</i> _GS1)                                                                                                                                                                                                                                                                                                                                                                                                                                     |
|                          | Hap_9 (1)              | 259         | PP586229 ( <i>C. (Trithecoides)</i> sp._PR24)                                                                                                                                                                                                                                                                                                                                                                                                                                   |
|                          | Hap_10 (1)             | 257         | PP586230 ( <i>C. (Trithecoides)</i> sp._PR15)                                                                                                                                                                                                                                                                                                                                                                                                                                   |
|                          | Hap_11 (2)             | 257         | PP586231 ( <i>C. guttifer</i> _TP48; <i>C. mahasarakhamense</i> _TP64)                                                                                                                                                                                                                                                                                                                                                                                                          |
|                          | Hap_12 (1)             | 257         | PP586232 ( <i>C. guttifer</i> _TP48)                                                                                                                                                                                                                                                                                                                                                                                                                                            |
|                          | Hap_13 (1)             | 257         | PP586233 ( <i>C. guttifer</i> _TP48)                                                                                                                                                                                                                                                                                                                                                                                                                                            |
| <i>L. orientalis</i>     | Hap_14 (5)             | 251         | PP586234 ( <i>C. mahasarakhamense</i> _PR22, TP45; <i>C. oxystoma</i> _GS12; <i>C. guttifer</i> _TP53) and MG731230 (a patient from Nan)                                                                                                                                                                                                                                                                                                                                        |
|                          | Hap_15 (1)             | 251         | PP586235 ( <i>C. (Trithecoides)</i> sp._PR11)                                                                                                                                                                                                                                                                                                                                                                                                                                   |
|                          | Hap_16 (1)             | 253         | PP586236 ( <i>C. (Trithecoides)</i> sp._PR24)                                                                                                                                                                                                                                                                                                                                                                                                                                   |

**Table S2.** Haplotypes of 49 *L. martiniquensis* and 23 *L. orientalis* ITS1 sequences amplified from *Culicoides* biting midges collected in this study and patients previously reported from Northern Thailand. (Continued)

| Species | Haplotypes (frequency) | Length (bp) | Accession numbers of associated <i>Leishmania</i> ITS1 sequences and hosts |
|---------|------------------------|-------------|----------------------------------------------------------------------------|
|         | Hap_17 (1)             | 251         | PP586237 ( <i>C. (Trithecoides)</i> sp._PR5)                               |
|         | Hap_18 (1)             | 248         | PP586238 ( <i>C. (Trithecoides)</i> sp._PR3)                               |
|         | Hap_19 (1)             | 250         | PP586239 ( <i>C. mahasarakhamense</i> _TP54)                               |
|         | Hap_20 (1)             | 250         | PP586240 ( <i>C. orientalis</i> _PR2)                                      |
|         | Hap_21 (3)             | 250         | PP586241 ( <i>C. guttifer</i> _TP38, TP48, TP63)                           |
|         | Hap_22 (1)             | 249         | PP586242 ( <i>C. mahasarakhamense</i> _TP33)                               |
|         | Hap_23 (1)             | 251         | PP586243 ( <i>C. mahasarakhamense</i> _TP59)                               |
|         | Hap_24 (1)             | 251         | PP586244 ( <i>C. oxystoma</i> _GS10)                                       |
|         | Hap_25 (1)             | 250         | PP586245 ( <i>C. guttifer</i> _TP65)                                       |
|         | Hap_26 (1)             | 253         | PP586246 ( <i>C. mahasarakhamense</i> _TP51)                               |
|         | Hap_27 (1)             | 250         | PP586247 ( <i>C. mahasarakhamense</i> _TP57)                               |
|         | Hap_28 (1)             | 251         | PP586248 ( <i>C. guttifer</i> _TP34)                                       |
|         | Hap_29 (1)             | 251         | PP586249 ( <i>C. jacobsoni</i> _PR23)                                      |
|         | Hap_30 (1)             | 251         | PP586250 ( <i>C. mahasarakhamense</i> _TP64)                               |
